# Supplementary material for: Estimates of Pandemic Influenza Vaccine Effectiveness in Europe, 2009–2010: Results of Influenza Monitoring Vaccine Effectiveness in Europe (I-MOVE) Multicentre Case-Control Study
Source: PubMed Central journal article supplement (PMC3019108; doi:10.1371/journal.pmed.1000388), 2011-01-11
Supplement: pmed.1000388.s002.pdf [file pmed.1000388.s002.pdf]

Figure S2 - Flowchart of data exclusion for pooled analysis, I-MOVE multi-centre case control studies 2009-10

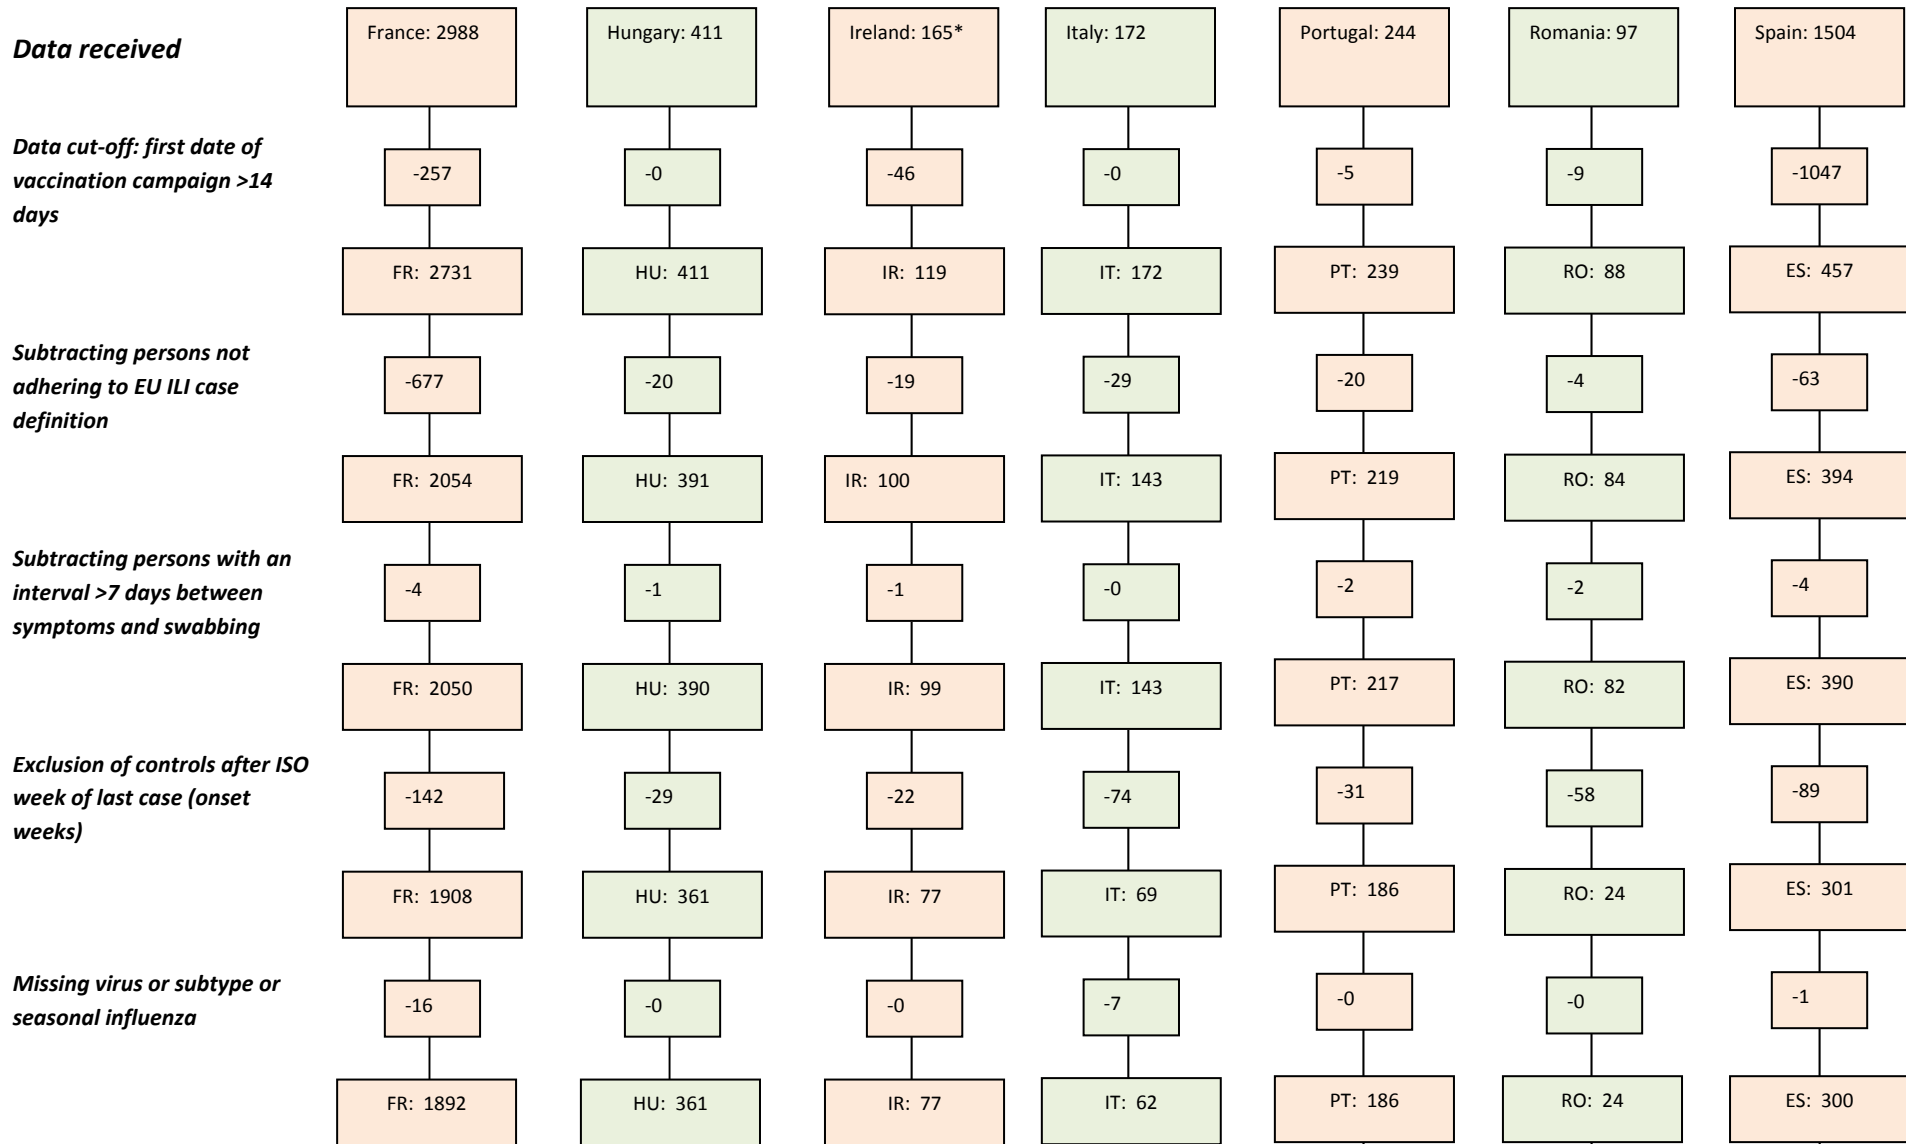

\* 1 record excluded for Ireland as they had previous A(H1N1)v
